# Supplementary material for: Quality improvement study on early recognition and intervention of caregiver burden in a tertiary hospital
Source: PubMed Central journal article supplement — BMJ Open Qual. 2020 Aug 4;9(3):e000873. doi: 10.1136/bmjoq-2019-000873 (PMC7406019; doi:10.1136/bmjoq-2019-000873), 2020-08-04
Supplement: bmjoq-2019-000873supp001.pdf [file bmjoq-2019-000873supp001.pdf]

Running head: A QUALITY IMPROVEMENT STUDY ON EARLY RECOGNITION AND INTERVENTION OF CAREGIVER BURDEN IN A TERTIARY HOSPITAL

### Appendix 1: Questionnaire

Date: \_\_\_\_\_ Number: \_\_\_\_\_

#### Part 1: Caregiver Demographic (circle the answer):

| Question                                     | Answer                                                                                                                 | Note |
|----------------------------------------------|------------------------------------------------------------------------------------------------------------------------|------|
| Age                                          | 0= < 40 years<br>1= 41 to 60 years<br>2= 61 to 80 years<br>3= >80 years                                                |      |
| Gender                                       | 0=Male<br>1=Female                                                                                                     |      |
| Race                                         | 0=Chinese<br>1=Indian<br>2=Malay<br>3=Others                                                                           |      |
| Marital status                               | 0=Single<br>1=Married<br>2= Separated / Divorced<br>3=Widowed                                                          |      |
| Highest educational level                    | 0= No formal education<br>1=Primary school<br>2=Secondary school<br>3= >Tertiary (College/<br>Polytechnic/ University) |      |
| Employment status                            | 0=Looking for job (unemployed)<br>1=Working part time<br>2=Working full time<br>3 = Home-maker<br>4= Retired           |      |
| Living arrangement with patient              | 0= Living together<br>1= Living apart                                                                                  |      |
| Duration of caregiving                       | 0= less than 1 month<br>1= 1 to 12 months<br>2=more than 1 year<br>3=more than 2 years                                 |      |
| Relationship between caregiver and recipient | 0=Spouse<br>1= Daughter/ Son<br>2=In-law                                                                               |      |

A QUALITY IMPROVEMENT STUDY ON EARLY RECOGNITION AND INTERVENTION OF CAREGIVER BURDEN IN A TERTIARY HOSPITAL

|                                            |                                                                                                                                                                   |  |
|--------------------------------------------|-------------------------------------------------------------------------------------------------------------------------------------------------------------------|--|
|                                            | 3=Grandchild<br>4= Relative or close friend                                                                                                                       |  |
| Foreign Domestic Worker as Additional help | 0=Yes<br>1=No                                                                                                                                                     |  |
| Other responsibilities                     | 0=None<br>1=Work commitments<br>2=Taking care of another ill or elderly person at home<br>3=Taking care of your own family with small children<br>4=Others: _____ |  |

**Part 2: Zarit Burden Interview (ZARIT BURDEN INTERVIEW)**

Score: 0=Never, 1=Rarely, 2=Sometimes, 3=Quite Frequently, 4=Nearly Always

| Question                                                                                                                    | Admission | At 30 days post discharge follow up |
|-----------------------------------------------------------------------------------------------------------------------------|-----------|-------------------------------------|
| 1. Do you feel that because of the time you spend with your relative that you don't have enough time for yourself?          |           |                                     |
| 2. Do you feel stressed between caring for your relative and trying to meet other responsibilities for your family or work? |           |                                     |
| 3. Do you feel angry when you are around your relative?                                                                     |           |                                     |
| 4. Do you feel your relative currently affects your relationship with other family members or friends in a negative way?    |           |                                     |
| 5. Do you feel strained when you are around your relative?                                                                  |           |                                     |
| 6. Do you feel your health has suffered because of your involvement with your relative?                                     |           |                                     |
| 7. Do you feel that you don't have as much privacy as your like because of your relative?                                   |           |                                     |
| 8. Do you feel that your social life has suffered because you are caring for your relative?                                 |           |                                     |
| 9. Do you feel you have lost control of your life since your relative's illness?                                            |           |                                     |
| 10. Do you feel uncertain about what to do about your relative?                                                             |           |                                     |

A QUALITY IMPROVEMENT STUDY ON EARLY RECOGNITION AND INTERVENTION OF CAREGIVER BURDEN IN A TERTIARY HOSPITAL

|                                                                        |  |  |
|------------------------------------------------------------------------|--|--|
| 11. Do you feel you should be doing more for your relative?            |  |  |
| 12. Do you feel you could do a better job in caring for your relative? |  |  |
| <b>Total Score</b>                                                     |  |  |

**Part 3: Patient Demographic**

| Question                      | Answer                                                                                                                                                           | Note |
|-------------------------------|------------------------------------------------------------------------------------------------------------------------------------------------------------------|------|
| Age                           | 0= < 40 years<br>1= 41 to 60 years<br>2= 61 to 80 years<br>3= >80 years                                                                                          |      |
| Gender                        | 0=Male<br>1=Female                                                                                                                                               |      |
| Race                          | 0=Chinese<br>1=Indian<br>2=Malay<br>3=Others                                                                                                                     |      |
| Modified Barthel Index Score  | 0=<15 (moderate disability)<br>1=<10 (severe disability)<br>2=>16 ( independent)                                                                                 |      |
| Number of co-morbidities      | 0= Less than 2<br>1=2 to 5<br>2=More than 5                                                                                                                      |      |
| Abbreviated Mental Test Score | 0=0-3 (Severe Impairment)<br>1=4-6 (Moderate Impairment)<br>2=>6 (Normal)                                                                                        |      |
| Number of medications         | 0=Less than 5<br>1=5 to 10<br>2=More than 10                                                                                                                     |      |
| Clinical Frailty Score        | 1=Very Fit<br>2=Well<br>3=Managing Well<br>4=Vulnerable<br>5=Mildly Frail<br>6=Moderately Frail<br>7=Severely Frail<br>8=Very Severely Frail<br>9=Terminally Ill |      |
